# Supplementary material for: Mapping N- and C-terminals of Leishmania donovani tyrosine aminotransferase by gene truncation strategy: a functional study using in vitro and in silico approaches
Source: PubMed Central journal article supplement (PMC7385629; doi:10.1038/s41598-020-69512-y), 2020-07-27
Supplement: 41598_2020_69512_MOESM1_ESM.pdf [file 41598_2020_69512_MOESM1_ESM.pdf]

Mapping N- and C-terminals of *Leishmania donovani* tyrosine aminotransferase by gene truncation strategy: A functional study using in vitro and in silico approaches.

Santanu Sasidharan and Prakash Saudagar\*

Department of Biotechnology, National Institute of Technology, Warangal-506004, Telangana, India

\*Corresponding author

Dr. Prakash Saudagar

Department of Biotechnology,

National Institute of Technology, Warangal-506004, T.S.

E-mail: [ps@nitw.ac.in](mailto:ps@nitw.ac.in)

Phone no: +91 870 2462898

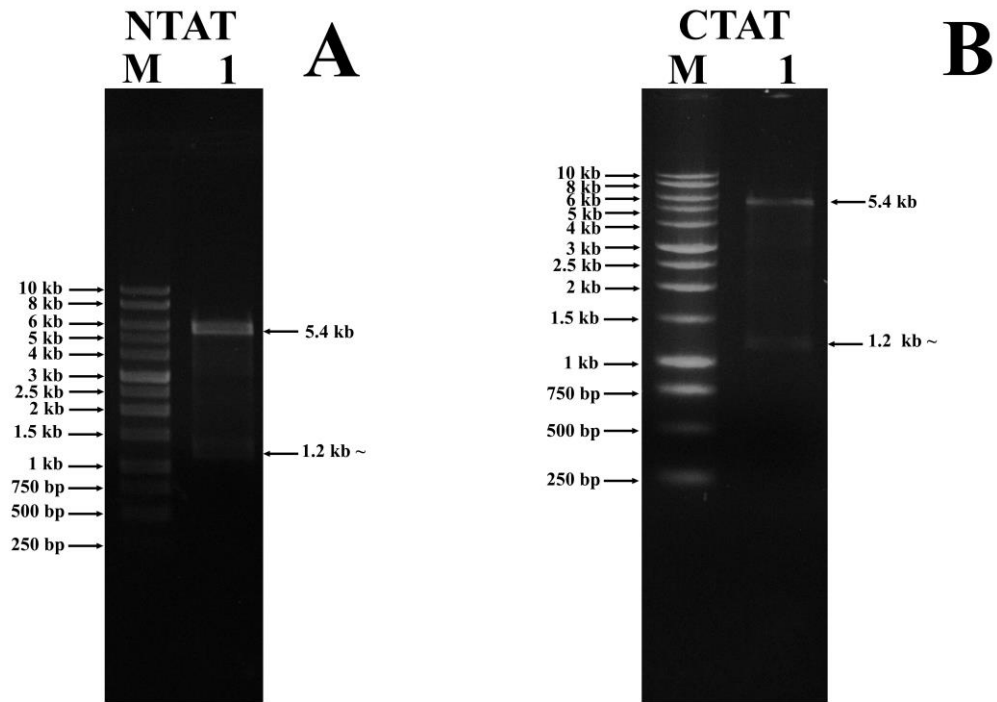

**Supplementary data 1: Clone confirmation of NTAT and CTAT with BamHI and HindIII restriction digestion: (A) & (B) Lane M: 1kb DNA ladder (Promega) Lane 1: pET28a (+) vector band at 5.4 kb with the release of the insert at 1.2 kb ~ of NTAT and CTAT.**

**NTAT:**

ACCGACAACATGAAGCCTTCCCGCTCCACTAAGTCGAACTTGCGTCTCTCCATCGGCGACCC  
CACTGTGACGGCAATCTAAAGACCCCGACATTGTAACAGAGGCAATGGTAGATGTAGTG  
CGCTCTGGCAAGTTCAACGGCTACCCGCCGACGGTCGGGGCAGACAACCTGCGCCAGGTGG  
TGTCGACCTACTGGCGCCGCTTCTGCCAGACCAAGTCTCGTCAAGAGGCGTTGAAGTGGGAG  
AACGTGATCATCACGTCCGGTGTGTGCGAGGCCATCGTGCTCGCTCTCACGGCACTGTGCAA  
CGAGGGCGACAACATCCTCGTGTGCGCCCCATCGTTTCCCCACTACAAGAGCGTCTGCGACA  
GCTACGGCATCGAGTGCCGCTACTATTACCTCGACCCCTCGAAGAGCTGGGAGTGCGACCTC  
AGAGCTGCGGCCGGTATGGTGGATAGCCACACCAAGGCATTTGTCATCATCAACCCCTCCAA  
CCCGTGCAGCAACTTCTCCCGTGCACACGTGAGCGATATCATCGATTTCTGCCAGCAGC  
ACCAGATCCCCTCATCAGTGACGAAATCTACGCTGAGATGGTGTGAACAACGGCATCTTC  
ACGTCTGTCGCCGACTTCGACACGAACGTTCCGCGTCTCATCCTGGGCGGCACAGCCAAGTA  
TCAGGTCTGCCCCGGCTGGCGCGTAGGCTGGTCTATTCTGATCGACCCAATGAACGTTGCGG  
GAGACTGGGCTGTCGGAATGGAGCGACTGACCCAGCTCATCGCTGGCGTCAACTCTATCTGC  
CAGGAGGCGATTGCGCGGACACTGCTCAAGTGCCCGGCGGAGTGCACCGAGCACATCGTCA  
CTCAACTGGAGGCCGGCGCCAAAGTGTACGCCGACTGCTCGAACACGACATTGGCATCTCC  
ATGGAGGCGCCGAGGCCTCCATGTTCTGTGATGCTCAAGCTGAACCTCAGCTACTTTCAGGA  
TTTGAAGTCGGACATGGAGTTCTACGAGAACTGCTGGATGAGGAGAACGTGCAGGTGCTG  
CCGGGTGAGATCTTTGGCATGAGTGGCTTCCCTCGTGCAACGGTTTCCCGCCATCGGCGGT  
GCTGAATGAGGCAGTCGACCGCATCATCGAGTTCTGCGAGCGCCACAAGAAGTAG

**CTAT:**

ATGACGATTGATACGCAGGCCGCACCCGCTGCTCAAACCTTGAAGGCCGGCAACGCCACAG  
GATCTCTACCGAGGAGCGCCGCGAGGTGCGAGCAGCAGCGCGCAGCTGAGAACACGAGTTT  
TCGCCGTATCGCGTCTCGAAGCACGCCAGCGAACCCCTGCAGCCGTTGAACAACCTGACCC  
ACAACATGAAGCCTTCCCGCTCCACTAAGTCGAACTTGCGTCTCTCCATCGGCGACCCCACT  
GTCGACGGCAATCTAAAGACCCCGACATTGTAACAGAGGCAATGGTAGATGTAGTGCCT  
CTGGCAAGTTCAACGGCTACCCGCCGACGGTTCGGGGCAGACAACCTGCGCCAGGTGGTGTG  
GACCTACTGGCGCCGCTTCTGCCAGACCAAGTCTCGTCAAGAGGCGTTGAAGTGGGAGAAC  
GTGATCATCACGTCCGGTGTGTGCGAGGCCATCGTGCTCGCTCTCACGGCACTGTGCAACGA  
GGGCGACAACATCCTCGTGTGCGCCCCATCGTTTCCCCACTACAAGAGCGTCTGCGACAGCT  
ACGGCATCGAGTGCCGCTACTATTACCTCGACCCCTCGAAGAGCTGGGAGTGCGACCTCAGA  
GCTGCGGCCGGTATGGTGGATAGCCACACCAAGGCATTTGTCATCATCAACCCCTCCAACCC  
GTGCGGCAGCAACTTCTCCCGTGCACACGTGAGCGATATCATCGATTTCTGCCAGCAGCACC  
AGATCCCCTCATCAGTGACGAAATCTACGCTGAGATGGTGTGAACAACGGCATCTTCACG  
TCTGTGCGCCGACTTCGACACGAACGTTCCGCGTCTCATCCTGGGCGGCACAGCCAAGTATCA  
GGTCTGCCCCGGCTGGCGCGTAGGCTGGTCTATTCTGATCGACCCAATGAACGTTGCGGGAG  
ACTGGGCTGTCGGAATGGAGCGACTGACCCAGCTCATCGCTGGCGTCAACTCTATCTGCCAG  
GAGGCGATTGCGCGGACACTGCTCAAGTGCCCGGCGGAGTGCACCGAGCACATCGTCACTC  
AACTGGAGGCCGGCGCCAAAGTGTACGCCGACTGCTCGAACACGACATTGGCATCTCCAT  
GGAGGCGCCGAGGCCTCCATGTTCTGTGATGCTCAAGCTGAACCTCAGCTACTTTCAG

**Supplementary data 2:** Nucleotide sequence data of NTAT and CTAT.

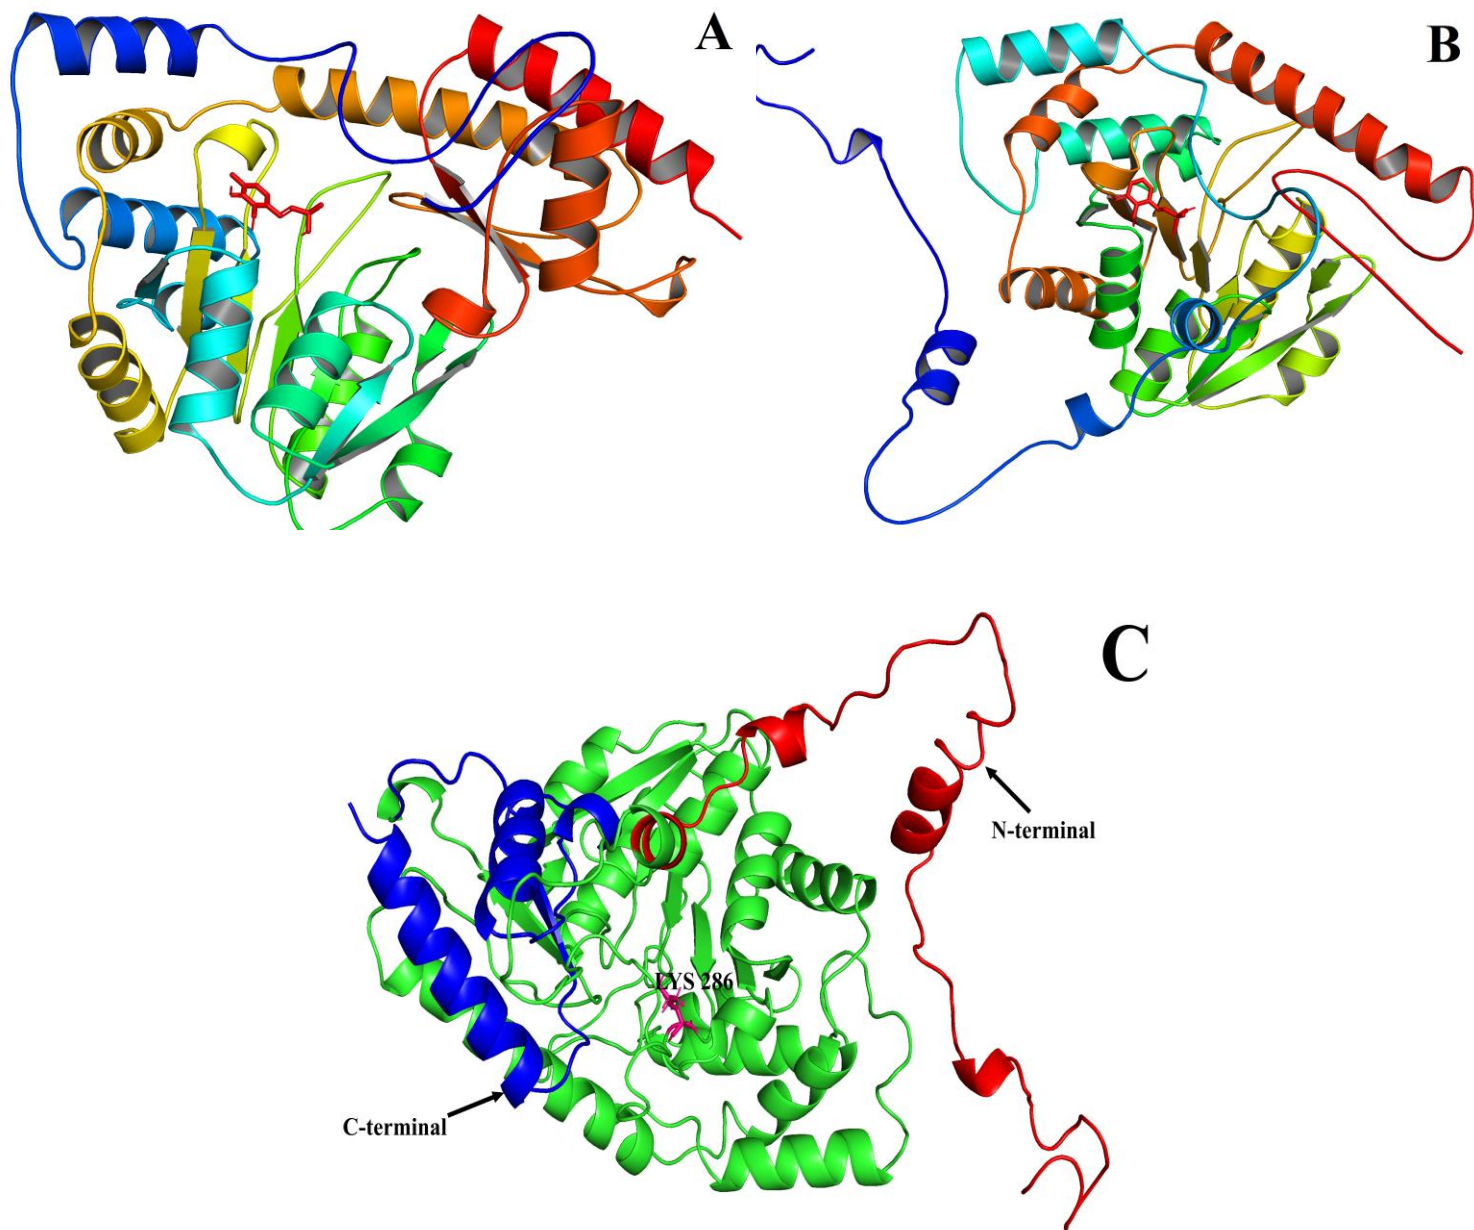

**Supplementary Data 3: Docked pose of NTAT and CTAT with PLP:** (A) The figure shows the co-factor PLP (in red) docked to NTAT in the active site of the enzyme. (B) The figure shows the C-terminal truncated CTAT with PLP (in red) docked in the active site cavity (C) Structure of complete tyrosine aminotransferase TAT with N-terminal in red and C-terminal in blue. The active site K286 is labeled and represented in magenta.

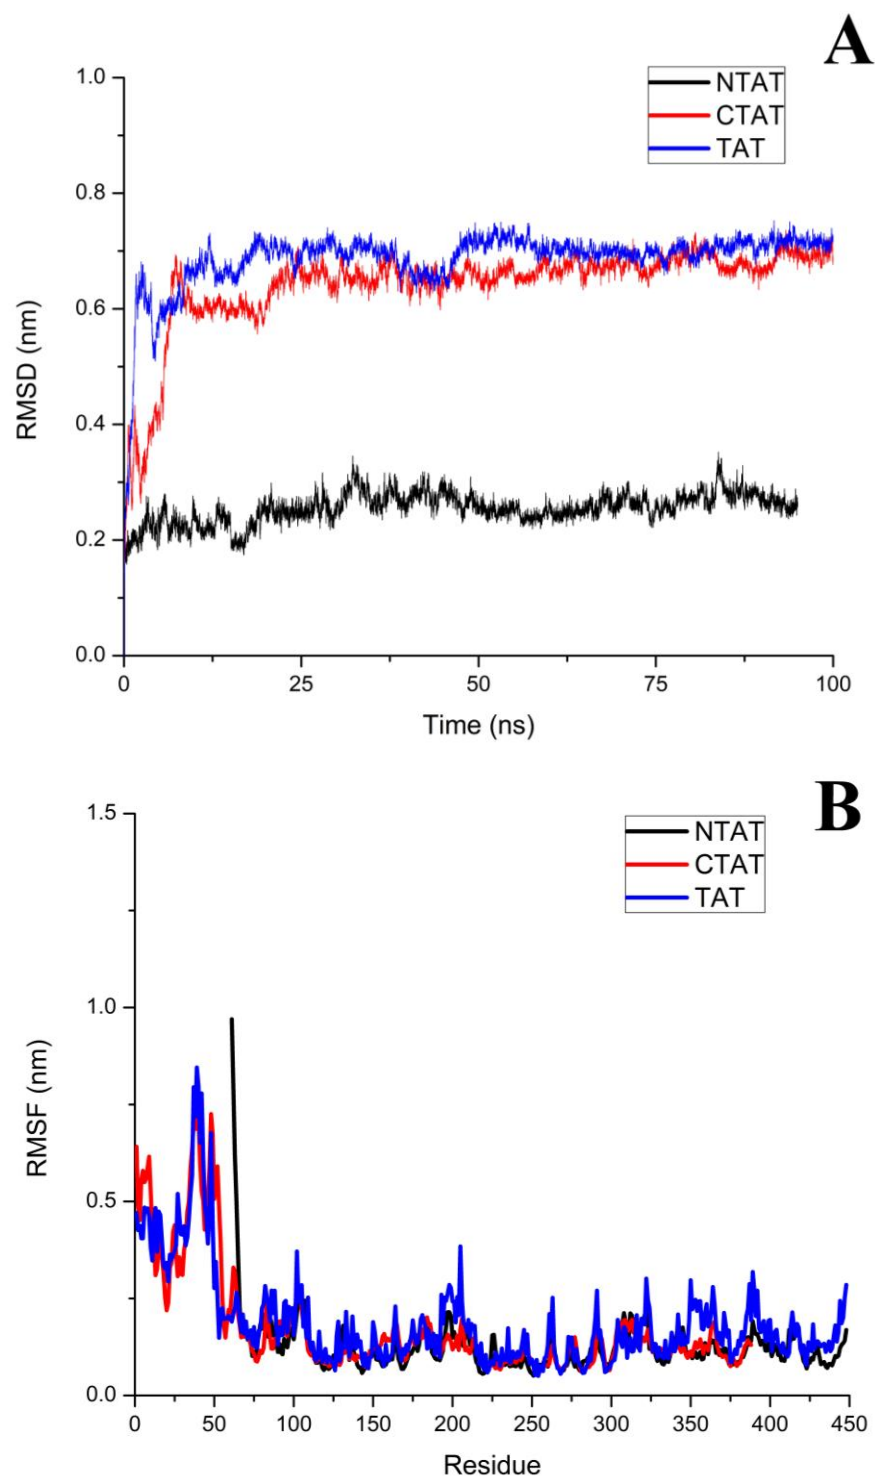

**Supplementary Data 4: RMSD-C $\alpha$  and RMSF analysis:** (A) RMSD-C $\alpha$  analysis of NTAT, CTAT and TAT is plotted in the figure. From the RMSD-C $\alpha$  values, NTAT structure was found to be very stable when compared to CTAT and TAT. (B) The plot shows the local fluctuations present in the truncated NTAT and CTAT as well as TAT protein. The NTAT RMSF analysis shows fluctuations in few residues near the 60<sup>th</sup> – 70<sup>th</sup> amino acids. Other regions exhibited very little fluctuations. The active site residues were found to have fewer fluctuations in all the proteins considered and the active site cavity was found to be very rigid. CTAT also had fluctuations only at the N-terminal like TAT.

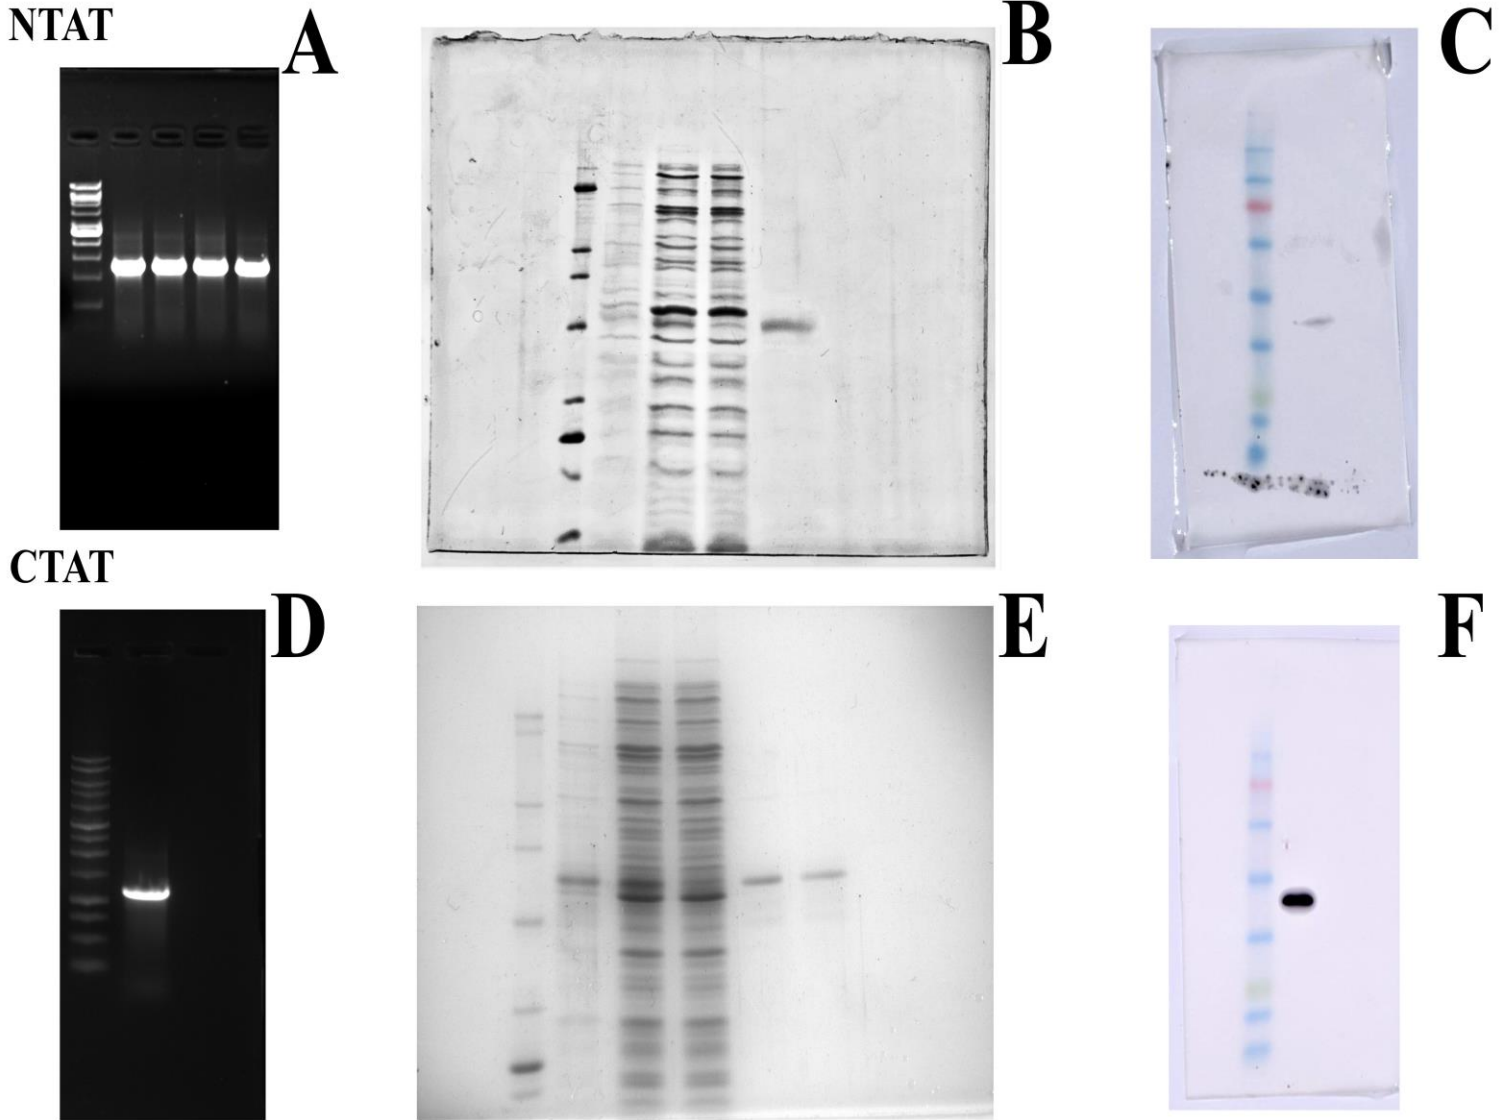

**Supplementary Data 5: Uncropped gel images: (A) and (D)** Agarose gel electrophoresis images showing NTAT and CTAT respectively **(B) and (E)** SDS-PAGE gel images of NTAT and CTAT respectively **(C) and (F)** Western Blot images of His-tagged NTAT and CTAT respectively.
